# Supplementary material for: Potentially Problematic Opioid Prescriptions Among Individuals With Private Insurance and Medicaid
Source: Atypon-hosted journal article supplement (doi:10.1176/appi.ps.201800555), 2019-05-06
Supplement: appi.ps.201800555.ds001.pdf [file appi.ps.201800555.ds001.pdf]

**Table A1. Opioid pain medications in the study and morphine equivalent conversion factors**

| Opioid Pain Medications                                  | Morphine Equivalent Conversion Factor |
|----------------------------------------------------------|---------------------------------------|
| Butorphanol                                              | 7                                     |
| Codeine                                                  | 0.15                                  |
| Dihydrocodeine                                           | 0.25                                  |
| Fentanyl                                                 |                                       |
| Fentanyl buccal or sublingual tablets, or lozenge/troche | 0.13                                  |
| Fentanyl film or oral spray                              | 0.18                                  |
| Fentanyl nasal spray                                     | 0.16                                  |
| Fentanyl (transdermal) patch, extended-released          | 7.2                                   |
| Hydrocodone                                              | 1                                     |
| Hydromorphone                                            | 4                                     |
| Levorphanol                                              | 11                                    |
| Meperidine                                               | 0.1                                   |
| Methadone                                                | 3                                     |
| Morphine                                                 | 1                                     |
| Oxycodone                                                | 1.5                                   |
| Oxymorphone                                              | 3                                     |
| Pentazocine                                              | 0.37                                  |
| Propoxyphene                                             | 0.23                                  |
| Tapentadol                                               | 0.4                                   |
| Tramadol                                                 | 0.1                                   |

**Table A2. Opioid drug use and indicators of problematic opioid prescription among commercially insured enrollees, 2005–**

| Indicators                          | 2005      |      | 2006      |      | 2007      |      | 2008      |      | 2009      |      | 2010      |      | 2011      |      |
|-------------------------------------|-----------|------|-----------|------|-----------|------|-----------|------|-----------|------|-----------|------|-----------|------|
|                                     | N         | %    | N         | %    | N         | %    | N         | %    | N         | %    | N         | %    | N         | %    |
| <b>High-dose opioid</b>             |           |      |           |      |           |      |           |      |           |      |           |      |           |      |
| None                                | 2,584,479 | 99.1 | 2,749,870 | 99.1 | 3,104,330 | 99.1 | 4,533,205 | 99.1 | 5,126,865 | 99.0 | 4,983,611 | 98.9 | 5,437,354 | 98.9 |
| Once                                | 19,335    | 0.7  | 19,929    | 0.7  | 23,267    | 0.7  | 35,707    | 0.8  | 44,152    | 0.9  | 45,780    | 0.9  | 48,925    | 0.9  |
| ≥2 incidents                        | 3,733     | 0.1  | 3,676     | 0.1  | 4,352     | 0.1  | 6,500     | 0.1  | 7,815     | 0.2  | 7,838     | 0.2  | 8,883     | 0.2  |
| <b>LA/ER opioids for acute pain</b> |           |      |           |      |           |      |           |      |           |      |           |      |           |      |
| None                                | 2,570,706 | 98.6 | 2,731,285 | 98.5 | 3,081,507 | 98.4 | 4,503,594 | 98.4 | 5,097,793 | 98.4 | 4,959,252 | 98.5 | 5,413,760 | 98.5 |
| Once                                | 18,959    | 0.7  | 23,294    | 0.8  | 28,226    | 0.9  | 39,923    | 0.9  | 43,399    | 0.8  | 41,488    | 0.8  | 43,342    | 0.8  |
| ≥2 incidents                        | 17,882    | 0.7  | 18,896    | 0.7  | 22,216    | 0.7  | 31,895    | 0.7  | 37,640    | 0.7  | 36,489    | 0.7  | 38,060    | 0.7  |
| <b>Opioid overlap</b>               |           |      |           |      |           |      |           |      |           |      |           |      |           |      |
| None                                | 2,451,477 | 94.0 | 2,609,808 | 94.1 | 2,940,225 | 93.9 | 4,287,174 | 93.7 | 4,842,283 | 93.5 | 4,692,270 | 93.2 | 5,117,899 | 93.1 |
| Once                                | 72,931    | 2.8  | 77,273    | 2.8  | 90,324    | 2.9  | 136,490   | 3.0  | 157,918   | 3.0  | 166,273   | 3.3  | 184,416   | 3.4  |
| ≥2 incidents                        | 83,139    | 3.2  | 86,394    | 3.1  | 101,400   | 3.2  | 151,748   | 3.3  | 178,631   | 3.4  | 178,686   | 3.5  | 192,847   | 3.5  |
| <b>Opioid/BZD overlap</b>           |           |      |           |      |           |      |           |      |           |      |           |      |           |      |
| None                                | 2,447,848 | 93.9 | 2,606,123 | 94.0 | 2,936,003 | 93.7 | 4,281,365 | 93.6 | 4,835,352 | 93.4 | 4,683,586 | 93.0 | 5,098,629 | 92.8 |
| Once                                | 61,667    | 2.4  | 66,389    | 2.4  | 77,444    | 2.5  | 116,489   | 2.5  | 133,522   | 2.6  | 137,412   | 2.7  | 152,955   | 2.8  |
| ≥2 incidents                        | 98,032    | 3.8  | 100,963   | 3.6  | 118,502   | 3.8  | 177,558   | 3.9  | 209,958   | 4.1  | 216,231   | 4.3  | 243,578   | 4.4  |
| <b>Multiple providers</b>           |           |      |           |      |           |      |           |      |           |      |           |      |           |      |
| None                                | 2,465,867 | 94.6 | 2,623,736 | 94.6 | 2,987,980 | 95.4 | 4,388,876 | 95.9 | 4,949,150 | 95.6 | 4,897,861 | 97.2 | 5,345,039 | 97.3 |
| Yes                                 | 141,680   | 5.4  | 149,739   | 5.4  | 143,969   | 4.6  | 186,536   | 4.1  | 229,682   | 4.4  | 139,368   | 2.8  | 150,123   | 2.7  |
| ≥4 Providers                        | 67,540    | 2.6  | 70,864    | 2.6  | 68,025    | 2.2  | 87,678    | 1.9  | 108,414   | 2.1  | 64,774    | 1.3  | 69,519    | 1.3  |
| ≥5 Providers                        | 34,770    | 1.3  | 35,814    | 1.3  | 34,504    | 1.1  | 44,407    | 1.0  | 54,440    | 1.1  | 32,328    | 0.6  | 34,106    | 0.6  |
| <b>Number of Indicators</b>         |           |      |           |      |           |      |           |      |           |      |           |      |           |      |
| None                                | 2,274,154 | 87.2 | 2,418,539 | 87.2 | 2,730,042 | 87.2 | 3,988,413 | 87.2 | 4,488,447 | 86.7 | 4,386,068 | 87.1 | 4,774,070 | 86.9 |
| One                                 | 210,788   | 8.1  | 226,196   | 8.2  | 259,721   | 8.3  | 382,220   | 8.4  | 448,269   | 8.7  | 427,159   | 8.5  | 478,405   | 8.7  |
| One incident                        | 152,985   | 5.9  | 165,607   | 6.0  | 183,348   | 5.9  | 262,031   | 5.7  | 306,638   | 5.9  | 271,239   | 5.4  | 301,427   | 5.5  |
| ≥2 incidents                        | 57,803    | 2.2  | 60,589    | 2.2  | 76,373    | 2.4  | 120,189   | 2.6  | 141,631   | 2.7  | 155,920   | 3.1  | 176,978   | 3.2  |
| Two                                 | 76,812    | 2.9  | 81,479    | 2.9  | 92,351    | 2.9  | 135,013   | 3.0  | 158,219   | 3.1  | 150,954   | 3.0  | 165,401   | 3.0  |
| ≥ Three                             | 45,793    | 1.8  | 47,261    | 1.7  | 49,835    | 1.6  | 69,766    | 1.5  | 83,897    | 1.6  | 73,048    | 1.5  | 77,286    | 1.4  |

**2015<sup>a</sup>**

<sup>a</sup> The population included in this study had at least one opioid prescription. The difference in the value in 2015 compared with the baseline year (2005) is statistically significant ( $p < 0.001$ ) for all indicators. Data source was Truven Health MarketScan Commercial Claims and Encounters data, 2005–2015.

LA/ER: Long acting or extended release, BZD: benzodiazepine

**Table A2 (continued). Opioid drug use and indicators of problematic opioid prescription among commercially insured enrollees, 2005–2015<sup>a</sup>**

| Indicators                          | 2012      |      | 2013      |      | 2014      |      | 2015      |      |
|-------------------------------------|-----------|------|-----------|------|-----------|------|-----------|------|
|                                     | N         | %    | N         | %    | N         | %    | N         | %    |
| <b>High-dose opioid</b>             |           |      |           |      |           |      |           |      |
| None                                | 5,438,875 | 99.0 | 4,247,917 | 99.0 | 4,158,338 | 99.0 | 3,103,125 | 99.0 |
| Once                                | 47,477    | 0.9  | 37,944    | 0.9  | 35,229    | 0.8  | 25,451    | 0.8  |
| ≥2 incidents                        | 8,670     | 0.2  | 7,019     | 0.2  | 6,516     | 0.2  | 4,841     | 0.2  |
| <b>LA/ER opioids for acute pain</b> |           |      |           |      |           |      |           |      |
| None                                | 5,414,806 | 98.5 | 4,232,889 | 98.6 | 4,138,592 | 98.5 | 3,096,434 | 98.8 |
| Once                                | 43,188    | 0.8  | 32,435    | 0.8  | 33,335    | 0.8  | 20,237    | 0.6  |
| ≥2 incidents                        | 37,028    | 0.7  | 27,556    | 0.6  | 28,156    | 0.7  | 16,746    | 0.5  |
| <b>Opioid overlap</b>               |           |      |           |      |           |      |           |      |
| None                                | 5,122,549 | 93.2 | 4,020,474 | 93.7 | 3,932,727 | 93.6 | 2,955,203 | 94.3 |
| Once                                | 183,397   | 3.3  | 134,303   | 3.1  | 135,176   | 3.2  | 90,201    | 2.9  |
| ≥2 incidents                        | 189,076   | 3.4  | 138,103   | 3.2  | 132,180   | 3.1  | 88,013    | 2.8  |
| <b>Opioid/BZD overlap</b>           |           |      |           |      |           |      |           |      |
| None                                | 5,095,710 | 92.7 | 3,987,349 | 92.9 | 3,895,639 | 92.8 | 2,909,473 | 92.9 |
| Once                                | 155,247   | 2.8  | 118,286   | 2.8  | 116,881   | 2.8  | 86,776    | 2.8  |
| ≥2 incidents                        | 244,065   | 4.4  | 187,245   | 4.4  | 187,563   | 4.5  | 137,168   | 4.4  |
| <b>Multiple providers</b>           |           |      |           |      |           |      |           |      |
| None                                | 5,339,700 | 97.2 | 4,143,458 | 96.5 | 4,074,288 | 97.0 | 3,024,640 | 89.8 |
| Yes                                 | 155,322   | 2.8  | 149,422   | 3.5  | 125,795   | 3.0  | 108,777   | 10.2 |
| ≥4 Providers                        | 71,467    | 1.3  | 67,324    | 1.6  | 56,688    | 1.3  | 47,689    | 6.6  |
| ≥5 Providers                        | 35,241    | 0.6  | 31,998    | 0.7  | 26,822    | 0.6  | 21,910    | 4.6  |
| <b>Number of Indicators</b>         |           |      |           |      |           |      |           |      |
| None                                | 4,769,594 | 86.8 | 3,728,144 | 86.8 | 3,650,258 | 86.9 | 2,734,038 | 87.3 |
| One                                 | 485,317   | 8.8  | 376,658   | 8.8  | 371,497   | 8.8  | 272,986   | 8.7  |
| One incident                        | 305,202   | 5.6  | 243,411   | 5.7  | 233,798   | 5.6  | 174,480   | 5.6  |
| ≥2 incidents                        | 180,115   | 3.3  | 133,247   | 3.1  | 137,699   | 3.3  | 98,506    | 3.1  |
| Two                                 | 163,939   | 3.0  | 126,717   | 3.0  | 121,755   | 2.   | 85,622    | 2.7  |
| ≥ Three                             | 76,172    | 1.4  | 61,361    | 1.4  | 56,573    | 1.3  | 40,771    | 1.3  |

<sup>a</sup> The population included in this study had at least one opioid prescription. The difference in the value in 2015 compared with the baseline year (2005) is statistically significant ( $p < 0.001$ ) for all indicators. Data source was Truven Health MarketScan Commercial Claims and Encounters data, 2005–2015.

LA/ER: Long acting or extended release, BZD: benzodiazepine

**Table A3. Opioid drug use and indicators of problematic opioid prescription among Medicaid enrollees, 2005–2015<sup>a</sup>**

| Indicators                          | 2005    |      | 2006    |      | 2007    |      | 2008    |      | 2009    |      | 2010    |      | 2011    |      |
|-------------------------------------|---------|------|---------|------|---------|------|---------|------|---------|------|---------|------|---------|------|
|                                     | N       | %    | N       | %    | N       | %    | N       | %    | N       | %    | N       | %    | N       | %    |
| <b>High-dose opioid</b>             |         |      |         |      |         |      |         |      |         |      |         |      |         |      |
| None                                | 556,170 | 98.9 | 495,877 | 98.8 | 249,827 | 98.5 | 406,176 | 98.7 | 521,465 | 98.8 | 588,917 | 98.6 | 556,278 | 98.6 |
| Once                                | 5,088   | 0.9  | 5,116   | 1.0  | 3,131   | 1.2  | 4,463   | 1.1  | 5,155   | 1.0  | 6,958   | 1.2  | 6,683   | 1.2  |
| ≥2 incidents                        | 906     | 0.2  | 879     | 0.2  | 711     | 0.3  | 946     | 0.2  | 1,075   | 0.2  | 1,311   | 0.2  | 1,296   | 0.2  |
| <b>LA/ER opioids for acute pain</b> |         |      |         |      |         |      |         |      |         |      |         |      |         |      |
| None                                | 548,658 | 97.6 | 490,210 | 97.7 | 246,439 | 97.1 | 401,696 | 97.6 | 516,306 | 97.8 | 584,456 | 97.9 | 552,914 | 98.0 |
| Once                                | 5,592   | 1.0  | 5,242   | 1.0  | 3,404   | 1.3  | 4,845   | 1.2  | 5,309   | 1.0  | 5,731   | 1.0  | 4,982   | 0.9  |
| ≥2 incidents                        | 7,914   | 1.4  | 6,420   | 1.3  | 3,826   | 1.5  | 5,044   | 1.2  | 6,080   | 1.2  | 6,999   | 1.2  | 6,361   | 1.1  |
| <b>Opioid overlap</b>               |         |      |         |      |         |      |         |      |         |      |         |      |         |      |
| None                                | 518,095 | 92.2 | 464,766 | 92.6 | 227,343 | 89.6 | 366,876 | 89.1 | 469,792 | 89.0 | 536,448 | 89.8 | 506,758 | 89.8 |
| Once                                | 20,547  | 3.7  | 17,842  | 3.6  | 11,571  | 4.6  | 21,250  | 5.2  | 28,404  | 5.4  | 28,351  | 4.7  | 26,783  | 4.7  |
| ≥2 incidents                        | 23,522  | 4.2  | 19,264  | 3.8  | 14,755  | 5.8  | 23,459  | 5.7  | 29,499  | 5.6  | 32,387  | 5.4  | 30,716  | 5.4  |
| <b>Opioid/BZD overlap</b>           |         |      |         |      |         |      |         |      |         |      |         |      |         |      |
| None                                | 492,947 | 87.7 | 461,573 | 92.0 | 217,001 | 85.5 | 354,918 | 86.2 | 459,352 | 87.0 | 517,976 | 86.7 | 488,245 | 86.5 |
| Once                                | 21,762  | 3.9  | 15,000  | 3.0  | 10,915  | 4.3  | 17,549  | 4.3  | 21,555  | 4.1  | 24,395  | 4.1  | 23,490  | 4.2  |
| ≥2 incidents                        | 47,455  | 8.4  | 25,299  | 5.0  | 25,753  | 10.2 | 39,118  | 9.5  | 46,788  | 8.9  | 54,815  | 9.2  | 52,522  | 9.3  |
| <b>Multiple providers</b>           |         |      |         |      |         |      |         |      |         |      |         |      |         |      |
| None                                | 525,476 | 93.5 | 468,773 | 93.4 | 228,736 | 90.2 | 382,471 | 92.9 | 488,740 | 92.6 | 551,346 | 92.3 | 524,504 | 93.0 |
| Yes                                 | 36,688  | 6.5  | 33,099  | 6.6  | 24,933  | 9.8  | 29,114  | 7.1  | 38,955  | 7.4  | 45,840  | 7.7  | 39,753  | 7.0  |
| ≥4 providers                        | 10,087  | 1.8  | 7,684   | 1.5  | 7,926   | 3.1  | 9,277   | 2.3  | 13,240  | 2.5  | 16,095  | 2.7  | 12,884  | 2.3  |
| ≥5 providers                        | 2,682   | 0.5  | 2,485   | 0.5  | 2,560   | 1.0  | 2,937   | 0.7  | 4,472   | 0.8  | 5,626   | 0.9  | 4,148   | 0.7  |
| <b>Number of indicators</b>         |         |      |         |      |         |      |         |      |         |      |         |      |         |      |
| None                                | 455,192 | 81.0 | 420,671 | 83.8 | 193,294 | 76.2 | 319,903 | 77.7 | 411,579 | 78.0 | 466,029 | 78.0 | 441,593 | 78.3 |
| One                                 | 65,179  | 11.6 | 49,595  | 9.9  | 34,709  | 13.7 | 54,157  | 13.2 | 69,141  | 13.1 | 78,562  | 13.2 | 73,855  | 13.1 |
| One incident                        | 39,339  | 7.0  | 35,636  | 7.1  | 22,236  | 8.8  | 33,531  | 8.1  | 44,464  | 8.4  | 49,443  | 8.3  | 44,799  | 7.9  |
| ≥2 incidents                        | 25,840  | 4.6  | 13,959  | 2.8  | 12,473  | 4.9  | 20,626  | 5.0  | 24,677  | 4.7  | 29,119  | 4.9  | 29,056  | 5.1  |
| Two                                 | 26,386  | 4.7  | 19,869  | 4.0  | 15,847  | 6.2  | 24,653  | 6.0  | 31,351  | 5.9  | 34,545  | 5.8  | 32,272  | 5.7  |
| ≥ Three                             | 15,407  | 2.7  | 11,737  | 2.3  | 9,819   | 3.9  | 12,872  | 3.1  | 15,624  | 3.0  | 18,050  | 3.0  | 16,537  | 2.9  |

<sup>a</sup> The population included in this study had at least one opioid prescription. The difference in the value in 2015 compared with the baseline year (2005) is statistically significant ( $p < 0.001$ ) for all indicators. Data source was Truven Health MarketScan Multi-State Medicaid data, 2005–2015.

LA/ER: Long acting or extended release, BZD: benzodiazepine

**Table A3 (continued). Opioid drug use and indicators of problematic opioid prescription among Medicaid enrollees, 2005–2015<sup>a</sup>**

| Indicators                          | 2012    |      | 2013    |      | 2014    |      | 2015      |      |
|-------------------------------------|---------|------|---------|------|---------|------|-----------|------|
|                                     | N       | %    | N       | %    | N       | %    | N         | %    |
| <b>High-dose opioid</b>             |         |      |         |      |         |      |           |      |
| None                                | 862,574 | 98.6 | 863,863 | 98.6 | 941,865 | 98.8 | 1,033,735 | 99.1 |
| Once                                | 10,151  | 1.2  | 10,038  | 1.1  | 9,179   | 1.0  | 7,484     | 0.7  |
| ≥2 incidents                        | 1,969   | 0.2  | 2,066   | 0.2  | 1,926   | 0.2  | 1,461     | 0.1  |
| <b>LA/ER opioids for acute pain</b> |         |      |         |      |         |      |           |      |
| None                                | 858,088 | 98.1 | 859,895 | 98.2 | 938,077 | 98.4 | 1,029,279 | 98.7 |
| Once                                | 7,450   | 0.9  | 7,246   | 0.8  | 6,773   | 0.7  | 6,701     | 0.6  |
| ≥2 incidents                        | 9,156   | 1.0  | 8,826   | 1.0  | 8,120   | 0.9  | 6,700     | 0.6  |
| <b>Opioid overlap</b>               |         |      |         |      |         |      |           |      |
| None                                | 750,109 | 85.8 | 751,289 | 85.8 | 840,896 | 88.2 | 937,017   | 89.9 |
| Once                                | 63,632  | 7.3  | 63,950  | 7.3  | 60,881  | 6.4  | 57,807    | 5.5  |
| ≥2 incidents                        | 60,953  | 7.0  | 60,728  | 6.9  | 51,193  | 5.4  | 47,856    | 4.6  |
| <b>Opioid/BZD overlap</b>           |         |      |         |      |         |      |           |      |
| None                                | 759,900 | 86.9 | 761,851 | 87.0 | 840,546 | 88.2 | 922,873   | 88.5 |
| Once                                | 34,779  | 4.0  | 34,056  | 3.9  | 33,562  | 3.5  | 34,685    | 3.3  |
| ≥2 incidents                        | 80,015  | 9.1  | 80,060  | 9.1  | 78,862  | 8.3  | 85,122    | 8.2  |
| <b>Multiple providers</b>           |         |      |         |      |         |      |           |      |
| None                                | 836,314 | 95.6 | 840,491 | 96.0 | 917,637 | 96.3 | 1,009,131 | 96.8 |
| Yes                                 | 38,380  | 4.4  | 35,476  | 4.0  | 35,333  | 3.7  | 33,549    | 3.2  |
| ≥4 providers                        | 12,410  | 1.4  | 11,027  | 1.3  | 11,091  | 1.2  | 10,594    | 1.0  |
| ≥5 providers                        | 3,790   | 0.4  | 3,334   | 0.4  | 3,432   | 0.4  | 3,315     | 0.3  |
| <b>Number of Indicators</b>         |         |      |         |      |         |      |           |      |
| None                                | 671,375 | 76.8 | 672,772 | 76.8 | 756,355 | 79.4 | 845,579   | 81.1 |
| One                                 | 126,124 | 14.4 | 128,439 | 14.7 | 129,352 | 13.6 | 131,973   | 12.7 |
| One incident                        | 75,830  | 8.7  | 75,484  | 8.6  | 76,177  | 8.0  | 73,239    | 7.0  |
| ≥2 incidents                        | 50,294  | 5.7  | 52,955  | 6.0  | 53,175  | 5.6  | 58,734    | 5.6  |
| Two                                 | 56,450  | 6.5  | 55,171  | 6.3  | 49,747  | 5.2  | 49,464    | 4.7  |
| ≥ Three                             | 20,745  | 2.4  | 19,585  | 2.2  | 17,516  | 1.8  | 15,664    | 1.5  |

<sup>a</sup> The population included in this study had at least one opioid prescription. The difference in the value in 2015 compared with the baseline year (2005) is statistically significant ( $p < 0.001$ ) for all indicators. Data source was Truven Health MarketScan Multi-State Medicaid data, 2005–2015.

LA/ER: Long acting or extended release, BZD: benzodiazepine

**Table A4. Demographic characteristics of commercial population and their opioid drug use, 2005–2015<sup>a</sup>**

|                                     | 2005      |      | 2006      |      | 2007      |      | 2008      |      | 2009      |      | 2010      |      | 2011      |      |
|-------------------------------------|-----------|------|-----------|------|-----------|------|-----------|------|-----------|------|-----------|------|-----------|------|
|                                     | N         | %    | N         | %    | N         | %    | N         | %    | N         | %    | N         | %    | N         | %    |
| <b>Age</b>                          |           |      |           |      |           |      |           |      |           |      |           |      |           |      |
| 18–24                               | 253,449   | 9.7  | 277,697   | 10.0 | 321,721   | 10.3 | 473,568   | 10.4 | 532,627   | 10.3 | 492,440   | 9.8  | 609,679   | 11.1 |
| 25–34                               | 470,589   | 18.0 | 512,431   | 18.5 | 582,979   | 18.6 | 883,170   | 19.3 | 999,435   | 19.3 | 953,720   | 18.9 | 1,025,261 | 18.7 |
| 35–44                               | 608,776   | 23.3 | 650,805   | 23.5 | 724,226   | 23.1 | 1,060,196 | 23.2 | 1,185,057 | 22.9 | 1,138,871 | 22.6 | 1,204,088 | 21.9 |
| 45–54                               | 713,806   | 27.4 | 750,100   | 27.0 | 844,395   | 27.0 | 1,216,963 | 26.6 | 1,379,330 | 26.6 | 1,344,756 | 26.7 | 1,429,961 | 26.0 |
| 55–64                               | 560,927   | 21.5 | 582,442   | 21.0 | 658,628   | 21.0 | 941,515   | 20.6 | 1,082,383 | 20.9 | 1,107,442 | 22.0 | 1,226,173 | 22.3 |
| Mean                                | 42.9      |      | 42.7      |      | 42.6      |      | 42.4      |      | 42.4      |      | 42.8      |      | 42.6      |      |
| <b>Sex</b>                          |           |      |           |      |           |      |           |      |           |      |           |      |           |      |
| Male                                | 1,086,923 | 41.7 | 1,172,570 | 42.3 | 1,323,075 | 42.2 | 1,943,819 | 42.5 | 2,195,214 | 42.4 | 2,121,607 | 42.1 | 2,349,905 | 42.8 |
| Female                              | 1,520,624 | 58.3 | 1,600,905 | 57.7 | 1,808,874 | 57.8 | 2,631,593 | 57.5 | 2,983,618 | 57.6 | 2,915,622 | 57.9 | 3,145,257 | 57.2 |
| <b>Number of opioid Rx obtained</b> |           |      |           |      |           |      |           |      |           |      |           |      |           |      |
| One                                 | 1,451,070 | 55.6 | 1,546,297 | 55.8 | 1,734,893 | 55.4 | 2,530,891 | 55.3 | 2,847,301 | 55.0 | 2,754,310 | 54.7 | 3,008,098 | 54.7 |
| Two                                 | 463,036   | 17.8 | 495,807   | 17.9 | 556,506   | 17.8 | 806,897   | 17.6 | 908,290   | 17.5 | 881,798   | 17.5 | 957,138   | 17.4 |
| ≥Three                              | 693,441   | 26.6 | 731,371   | 26.4 | 840,550   | 26.8 | 1,237,624 | 27.0 | 1,423,241 | 27.5 | 1,401,121 | 27.8 | 1,529,926 | 27.8 |
| Mean                                | 3.1       |      | 3.0       |      | 3.1       |      | 3.1       |      | 3.2       |      | 3.2       |      | 3.2       |      |

<sup>a</sup> The population included in this study had at least one opioid prescription. Data source was Truven Health MarketScan Commercial Claims and Encounters, 2005–2015.

Rx: Prescription

**Table A4 (continued). Demographic characteristics of commercial population and their opioid drug use, 2005–2015<sup>a</sup>**

|                                     | 2012      |      | 2013      |      | 2014      |      | 2015      |      |
|-------------------------------------|-----------|------|-----------|------|-----------|------|-----------|------|
|                                     | N         | %    | N         | %    | N         | %    | N         | %    |
| <b>Age</b>                          |           |      |           |      |           |      |           |      |
| 18–24                               | 629,105   | 11.4 | 498,896   | 11.6 | 484,334   | 11.5 | 358,528   | 11.4 |
| 25–34                               | 1,023,720 | 18.6 | 765,450   | 17.8 | 753,556   | 17.9 | 549,418   | 17.5 |
| 35–44                               | 1,190,597 | 21.7 | 921,334   | 21.5 | 900,325   | 21.4 | 655,703   | 20.9 |
| 45–54                               | 1,408,511 | 25.6 | 1,090,237 | 25.4 | 1,054,319 | 25.1 | 779,923   | 24.9 |
| 55–64                               | 1,243,089 | 22.6 | 1,016,963 | 23.7 | 1,007,549 | 24.0 | 789,845   | 25.2 |
| Mean                                | 42.6      |      | 42.9      |      | 42.9      |      | 43.2      |      |
| <b>Sex</b>                          |           |      |           |      |           |      |           |      |
| Male                                | 2,354,150 | 42.8 | 1,813,272 | 42.2 | 1,786,826 | 42.5 | 1,316,510 | 42.0 |
| Female                              | 3,140,872 | 57.2 | 2,479,608 | 57.8 | 2,413,257 | 57.5 | 1,816,907 | 58.0 |
| <b>Number of opioid Rx obtained</b> |           |      |           |      |           |      |           |      |
| One                                 | 3,026,660 | 55.1 | 2,410,937 | 56.2 | 2,376,494 | 56.6 | 1,821,130 | 58.1 |
| Two                                 | 952,557   | 17.3 | 732,705   | 17.1 | 709,732   | 16.9 | 525,888   | 16.8 |
| ≥Three                              | 1,515,805 | 27.6 | 1,149,238 | 26.8 | 1,113,857 | 26.5 | 786,399   | 25.1 |
| Mean                                | 3.2       |      | 3.1       |      | 3.1       |      | 2.9       |      |

<sup>a</sup> The population included in this study had at least one opioid prescription. Data source was Truven Health MarketScan Commercial Claims and Encounters, 2005–2015.

Rx: Prescription

**Table A5. Demographic characteristics of Medicaid population and their opioid drug use, 2005–2015<sup>a</sup>**

|                                     | 2005    |      | 2006    |      | 2007    |      | 2008    |      | 2009    |      | 2010    |      | 2011    |      |
|-------------------------------------|---------|------|---------|------|---------|------|---------|------|---------|------|---------|------|---------|------|
|                                     | N       | %    | N       | %    | N       | %    | N       | %    | N       | %    | N       | %    | N       | %    |
| <b>Age</b>                          |         |      |         |      |         |      |         |      |         |      |         |      |         |      |
| 18–24                               | 164,498 | 29.3 | 145,887 | 29.1 | 66,863  | 26.4 | 117,516 | 28.6 | 157,734 | 29.9 | 177,380 | 29.7 | 159,976 | 28.4 |
| 25–34                               | 173,486 | 30.9 | 150,352 | 30.0 | 69,781  | 27.5 | 124,085 | 30.1 | 165,319 | 31.3 | 188,498 | 31.6 | 179,988 | 31.9 |
| 35–44                               | 113,699 | 20.2 | 99,065  | 19.7 | 47,726  | 18.8 | 75,927  | 18.4 | 93,578  | 17.7 | 104,949 | 17.6 | 100,566 | 17.8 |
| 45–54                               | 68,395  | 12.2 | 65,733  | 13.1 | 40,989  | 16.2 | 58,616  | 14.2 | 69,713  | 13.2 | 78,892  | 13.2 | 76,352  | 13.5 |
| 55–64                               | 42,086  | 7.5  | 40,835  | 8.1  | 28,310  | 11.2 | 35,441  | 8.6  | 41,351  | 7.8  | 47,467  | 7.9  | 47,375  | 8.4  |
| Mean                                | 33.4    |      | 33.7    |      | 35.4    |      | 34.0    |      | 33.3    |      | 33.4    |      | 33.7    |      |
| <b>Sex</b>                          |         |      |         |      |         |      |         |      |         |      |         |      |         |      |
| Male                                | 114,707 | 20.4 | 104,040 | 20.7 | 56,412  | 22.2 | 87,447  | 21.2 | 111,271 | 21.1 | 130,401 | 21.8 | 124,999 | 22.2 |
| Female                              | 447,457 | 79.6 | 397,832 | 79.3 | 197,257 | 77.8 | 324,138 | 78.8 | 416,424 | 78.9 | 466,785 | 78.2 | 439,258 | 77.8 |
| <b>Race</b>                         |         |      |         |      |         |      |         |      |         |      |         |      |         |      |
| White                               | 356,511 | 63.4 | 322,100 | 64.2 | 157,404 | 62.1 | 249,427 | 60.6 | 313,729 | 59.5 | 361,966 | 60.6 | 324,341 | 57.5 |
| Black                               | 177,590 | 31.6 | 153,678 | 30.6 | 79,683  | 31.4 | 135,178 | 32.8 | 180,027 | 34.1 | 191,885 | 32.1 | 187,682 | 33.3 |
| Hispanic                            | 5,538   | 1.0  | 5,552   | 1.1  | 4,173   | 1.6  | 7,704   | 1.9  | 10,308  | 2.0  | 12,420  | 2.1  | 11,425  | 2.0  |
| Others                              | 22,525  | 4.0  | 20,542  | 4.1  | 12,409  | 4.9  | 19,276  | 4.7  | 23,631  | 4.5  | 30,915  | 5.2  | 40,809  | 7.2  |
| <b>Number of opioid Rx obtained</b> |         |      |         |      |         |      |         |      |         |      |         |      |         |      |
| One                                 | 230,001 | 40.9 | 203,868 | 40.6 | 101,747 | 40.1 | 164,352 | 39.9 | 209,018 | 39.6 | 236,502 | 39.6 | 227,646 | 40.3 |
| Two                                 | 101,309 | 18.0 | 88,508  | 17.6 | 43,227  | 17.0 | 71,985  | 17.5 | 93,637  | 17.7 | 104,945 | 17.6 | 98,187  | 17.4 |
| ≥Three                              | 230,854 | 41.1 | 209,496 | 41.7 | 108,695 | 42.8 | 175,248 | 42.6 | 225,040 | 42.6 | 255,739 | 42.8 | 238,424 | 42.3 |
| Mean                                | 4.4     |      | 4.4     |      | 4.9     |      | 4.8     |      | 4.8     |      | 4.7     |      | 4.7     |      |

<sup>a</sup> The population included in this study had at least one opioid prescription. Data source was Truven Health MarketScan Multi-State Medicaid data, 2005–2015.

Rx: Prescription



**Table A5 (continued). Demographic characteristics of Medicaid population and their opioid drug use, 2005–2015<sup>a</sup>**

|                                     | 2012    |      | 2013    |      | 2014    |      | 2015    |      |
|-------------------------------------|---------|------|---------|------|---------|------|---------|------|
|                                     | N       | %    | N       | %    | N       | %    | N       | %    |
| <b>Age</b>                          |         |      |         |      |         |      |         |      |
| 18–24                               | 226,472 | 25.9 | 211,986 | 24.2 | 205,379 | 21.6 | 213,216 | 20.4 |
| 25–34                               | 285,018 | 32.6 | 287,720 | 32.8 | 308,577 | 32.4 | 331,449 | 31.8 |
| 35–44                               | 166,591 | 19.0 | 171,770 | 19.6 | 194,079 | 20.4 | 219,491 | 21.1 |
| 45–54                               | 121,202 | 13.9 | 123,635 | 14.1 | 146,711 | 15.4 | 165,245 | 15.8 |
| 55–64                               | 75,411  | 8.6  | 80,856  | 9.2  | 98,224  | 10.3 | 113,279 | 10.9 |
| Mean                                | 34.3    |      | 34.7    |      | 35.7    |      | 36.1    |      |
| <b>Sex</b>                          |         |      |         |      |         |      |         |      |
| Male                                | 214,299 | 24.5 | 212,194 | 24.2 | 252,259 | 26.5 | 290,234 | 27.8 |
| Female                              | 660,395 | 75.5 | 663,773 | 75.8 | 700,711 | 73.5 | 752,446 | 72.2 |
| <b>Race</b>                         |         |      |         |      |         |      |         |      |
| White                               | 530,703 | 60.7 | 524,992 | 59.9 | 542,683 | 56.9 | 576,617 | 55.3 |
| Black                               | 271,620 | 31.1 | 279,017 | 31.9 | 294,066 | 30.9 | 313,100 | 30.0 |
| Hispanic                            | 19,273  | 2.2  | 19,254  | 2.2  | 21,076  | 2.2  | 22,084  | 2.1  |
| Others                              | 53,098  | 6.1  | 52,704  | 6.0  | 95,145  | 10.0 | 130,879 | 12.6 |
| <b>Number of opioid Rx obtained</b> |         |      |         |      |         |      |         |      |
| One                                 | 328,922 | 37.6 | 333,446 | 38.1 | 382,484 | 40.1 | 434,309 | 41.7 |
| Two                                 | 153,728 | 17.6 | 153,447 | 17.5 | 168,063 | 17.6 | 181,541 | 17.4 |
| ≥Three                              | 392,044 | 44.8 | 389,074 | 44.4 | 402,423 | 42.2 | 426,830 | 40.9 |
| Mean                                | 5.1     |      | 5.0     |      | 4.6     |      | 4.4     |      |

<sup>a</sup> The population included in this study had at least one opioid prescription. Data source was Truven Health MarketScan Multi-State Medicaid data, 2005–2015.

Rx: Prescription

**FIGURE A1. Indicators of potentially problematic opioid prescription with  $\geq 2$  incidents by age among Medicaid enrollees, 2005–2015<sup>a</sup>**

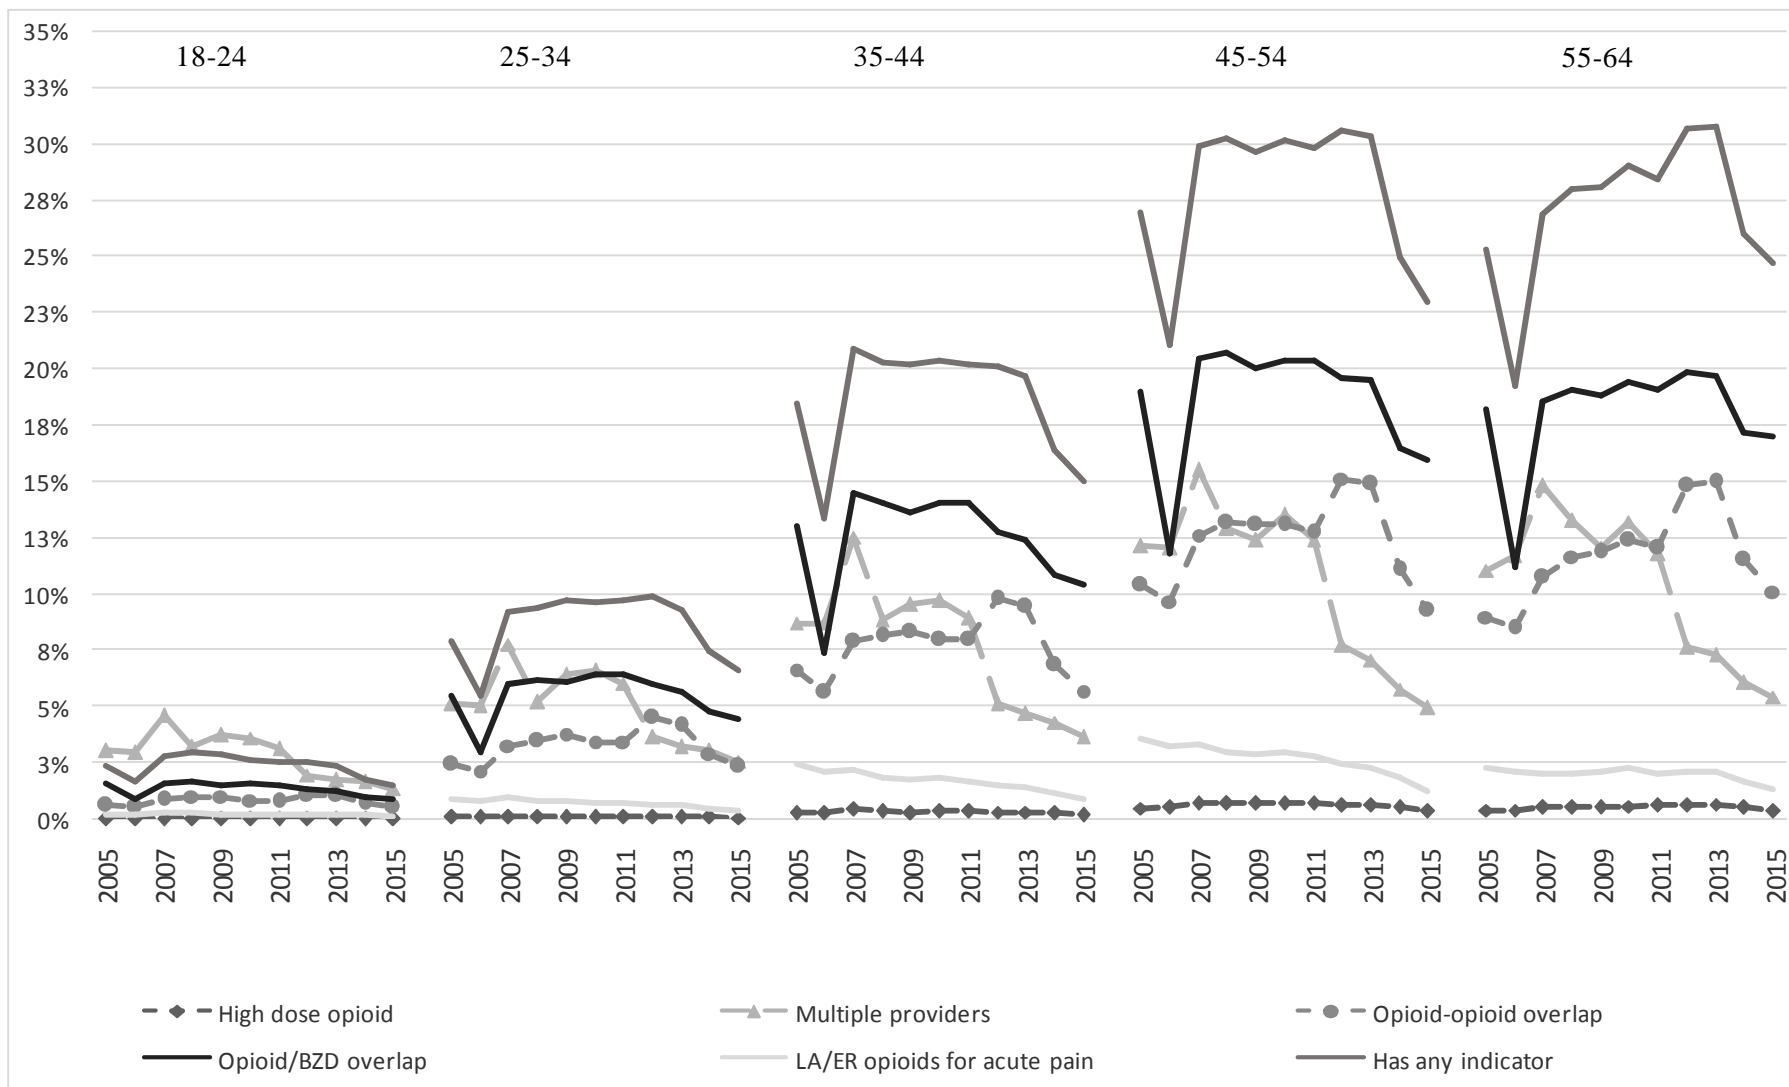

<sup>a</sup> The population included in this study had at least one opioid prescription. The difference in the value in 2015 compared with the baseline year (2005) is statistically significant ( $p < 0.001$ ) for all indicators, except high-dose opioid among 18-24 and 55-64 age groups and opioid-opioid overlap among 25-34 age group ( $p < 0.05$ ). Data source was Truven Health MarketScan Multi-State Medicaid data, 2005–2015.

LA/ER: Long-acting or Extended-release, BZD: Benzodiazepine

**Figure A2: Indicators of potentially problematic opioid prescription with  $\geq 2$  incidents by plan type among commercially insured enrollees, 2005–2015<sup>a</sup>**

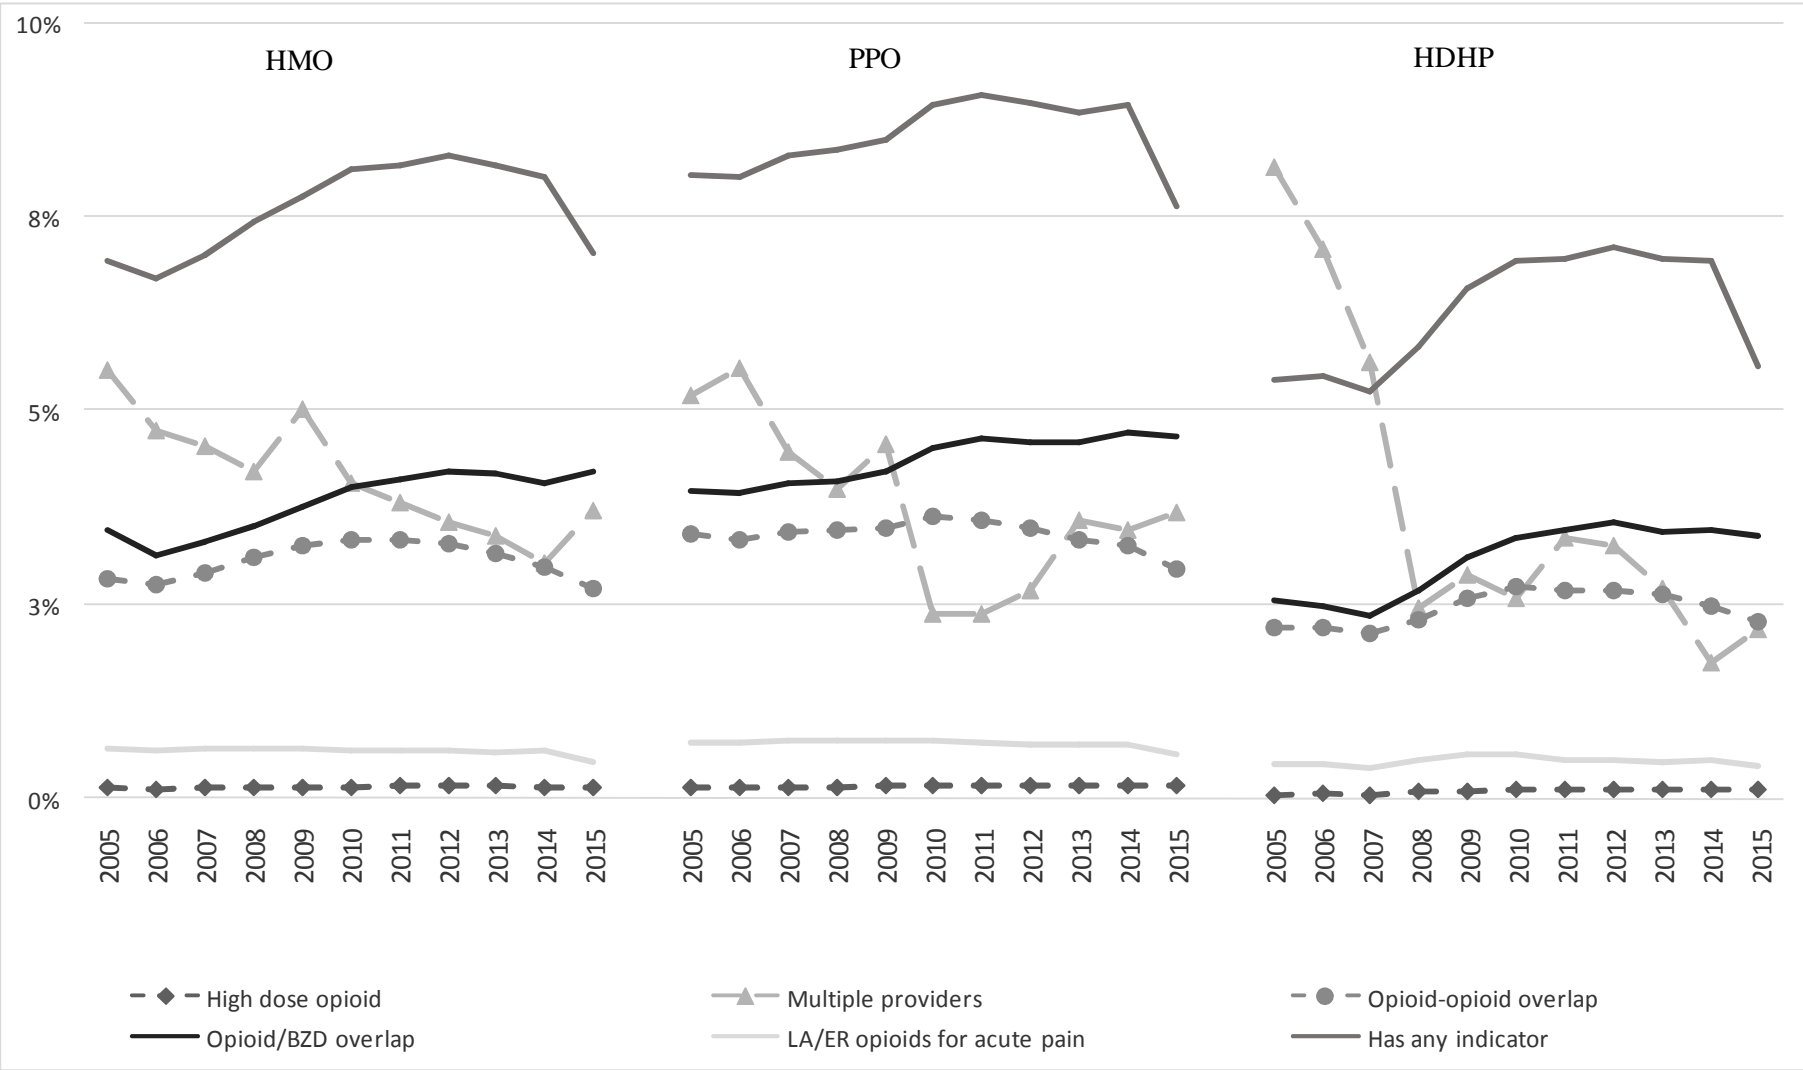

<sup>a</sup> The population included in this study had at least one opioid prescription. The difference in the value in 2015 compared to the baseline year (2005) is statistically significant ( $p < 0.001$ ) for all indicators, except high-dose opioid among HMO group and opioid-opioid overlap among HDHP group. Data source was Truven Health MarketScan Commercial Claims and Encounters data, 2005–2015.

LA/ER: Long acting or extended release, BZD: benzodiazepine

**Figure A3. Indicators of potentially problematic opioid prescription with  $\geq 2$  incidents by plan type among Medicaid enrollees, 2005–2015<sup>a</sup>**

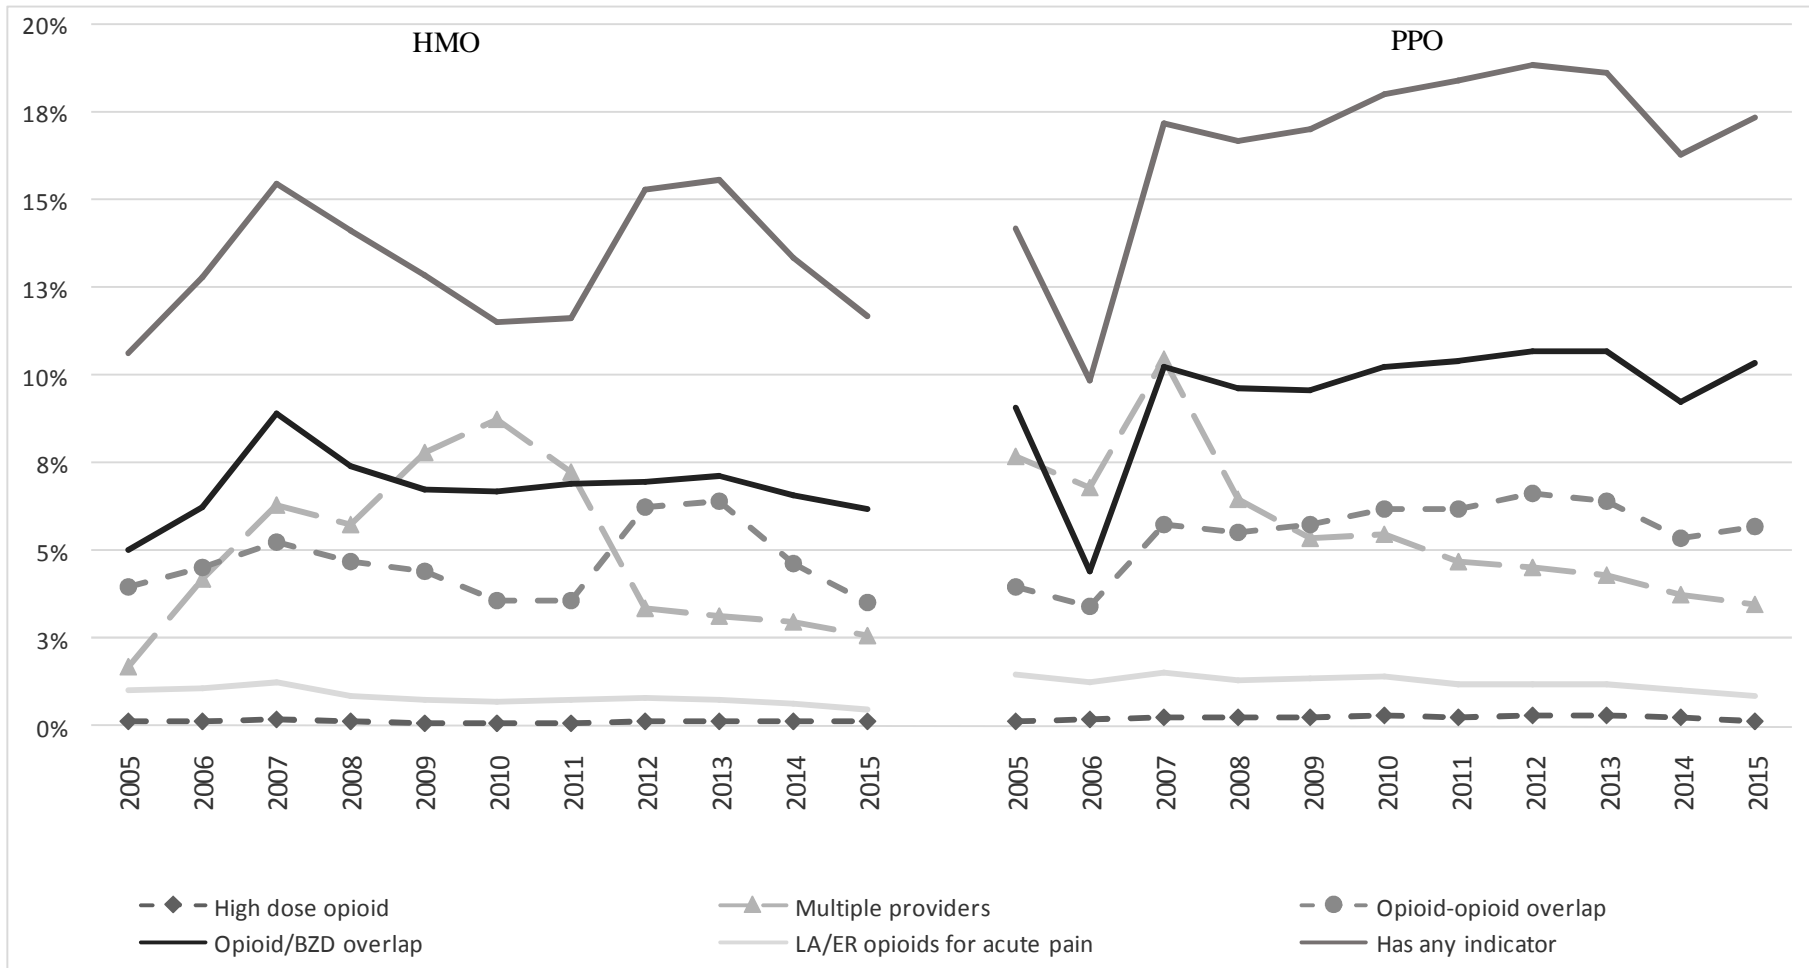

<sup>a</sup> The population included in this study had at least one opioid prescription. The difference in the value in 2015 compared to the baseline year (2005) is statistically significant ( $p < 0.001$ ) for all indicators, except high-dose opioid among both HMO and PPO groups. Data source was Truven Health MarketScan Multi-State Medicaid data, 2005–2015.

LA/ER: Long acting or extended release, BZD: benzodiazepine
